# Supplementary material for: Rapid detection of capsaicinoids via a Bi 2 S 3 /rGO/MWCNT-COOH-modified screen-printed electrode coupled with glass bead-assisted ultrasonic extraction
Source: Royal Society of Chemistry journal article supplement (doi:10.1039/d5an00440c), 2025-01-01
Supplement: d5an00440c1.pdf [file d5an00440c1.pdf]

**Supplementary Information (SI) for Analyst.**

Supporting Information

**Rapid detection of capsaicinoids via  
Bi<sub>2</sub>S<sub>3</sub>/rGO/MWCNT-COOH-modified  
screen-printed electrodes coupled with glass  
bead-assisted ultrasonic extraction**

Jie Jiang, Xuening Wang and Kai Yu\*

E-mail: yukai@hit.edu.cn

## Supplementary Information (SI) for Analyst.

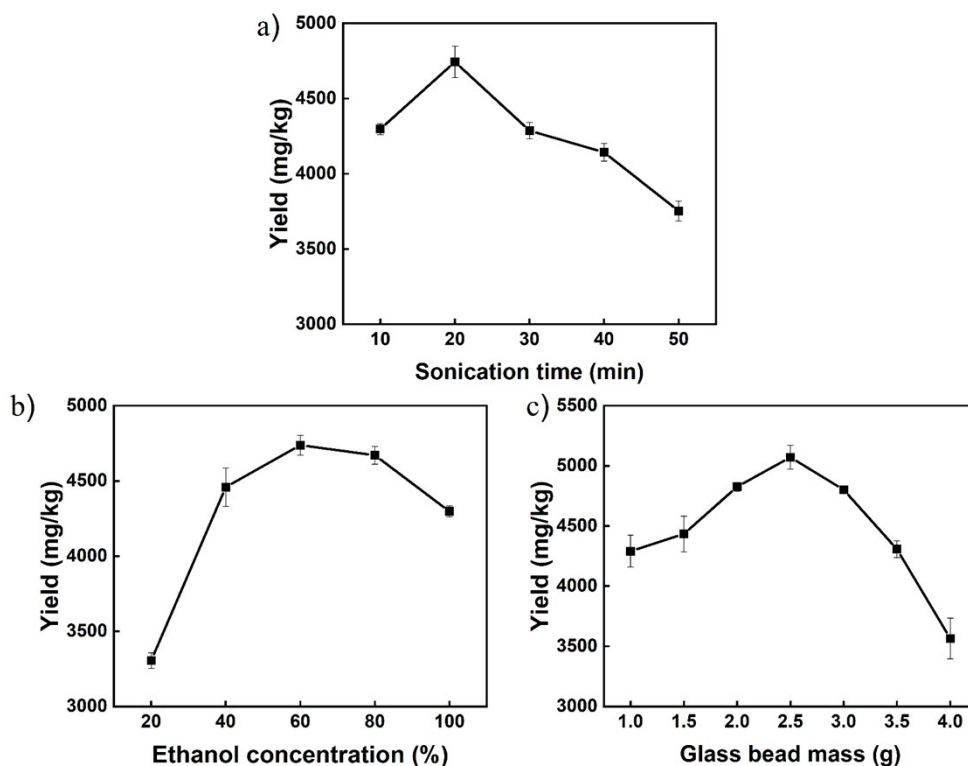

Fig. S1 Effects of (a) sonication time, (b) ethanol concentration, and (c) glass bead quality on the extraction yield of capsaicinoids.

The standard curves for capsaicin and dihydrocapsaicin, based on the peak areas of the standard samples, are provided. These curves are used to establish the relationship between the peak area and concentration of capsaicin and dihydrocapsaicin. The concentration of the target substance in the sample is then determined by comparing the sample's peak area to the standard curve. Once the mass concentration of the target substance in the sample is determined, the mass fraction can be calculated.

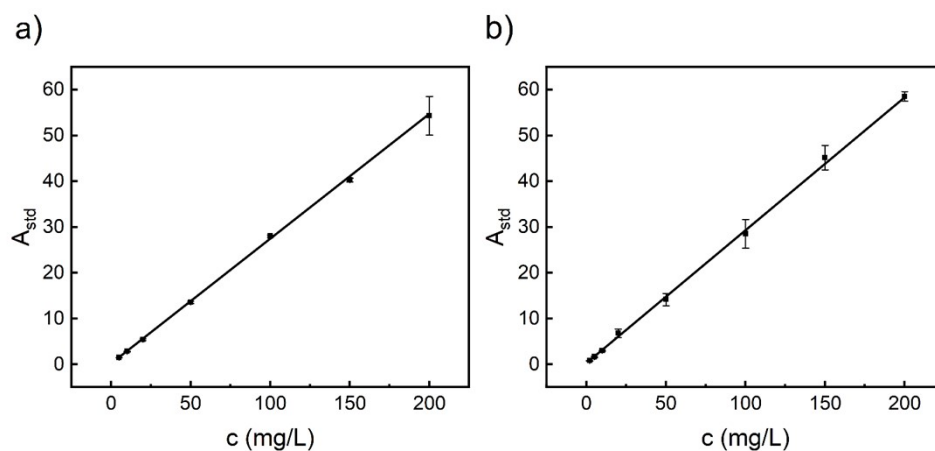

Fig. S2: Relationship between Standard Peak Area ( $A_{std}$ ) and Mass Concentration ( $c$ ) of (a) Capsaicin and (b) Dihydrocapsaicin.

## Supplementary Information (SI) for Analyst.

After extraction, the glass beads were separated from the extract by filtration and subjected to ultrasonic cleaning using deionized water and anhydrous ethanol (two cycles each) to remove residual pepper solids and organic solvents. The cleaned beads were then dried at 60 °C for 4 hours until completely moisture-free. The regenerated beads were reused under identical extraction conditions, and the capsaicinoids yield was recorded after each cycle to evaluate the effect of reuse on extraction efficiency.

To further assess structural stability, the morphology of the glass beads before use and after five reuse cycles was compared by optical microscopy.

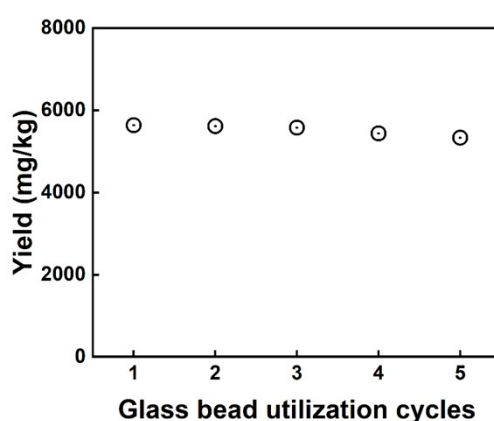

Fig. S3 Effect of glass bead reuse cycles on the extraction efficiency of capsaicinoids.

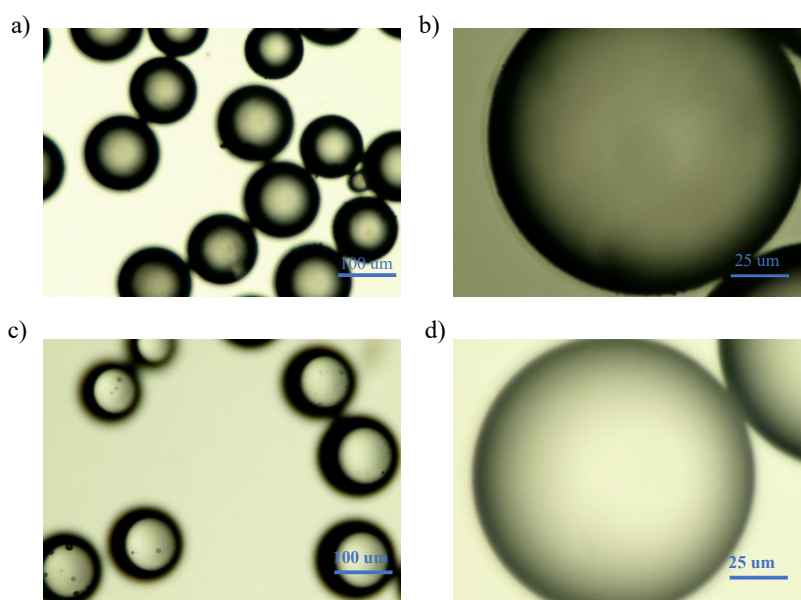

Fig. S4 Optical microscopy images comparing the morphology of glass beads before and after repeated use. (a) Overall morphology before the first use; (b) enlarged view of (a); (c) overall morphology after five cycles of reuse; (d) enlarged view of (c).

## Supplementary Information (SI) for Analyst.

The redox process follows the Randles–Sevcik equation:

$$I_p = (2.69 \times 10^5) n^{3/2} A D^{1/2} C v^{1/2}$$

where  $I_p$  represents the peak current (A) during the redox process;  $n$  represents the number of electron transfers, where it is 1;  $A$  represents the effective surface area of the electrode ( $\text{cm}^2$ );  $D$  represents the diffusion coefficient ( $\text{cm}^2/\text{s}$ ), and in a 5 mM  $[\text{Fe}(\text{CN})_6]^{3-/4-}$  solution, the diffusion coefficient  $D$  is  $7.6 \times 10^{-6} \text{ cm}^2/\text{s}$ ;  $C$  represents the concentration of  $[\text{Fe}(\text{CN})_6]^{3-/4-}$  ( $\text{mol}/\text{cm}^3$ );  $v$  represents the scan rate ( $\text{V}/\text{s}$ ).

Based on the slope of the linear fitting in the insets of Fig. S5 a–d, the effective electrochemical surface areas of the electrodes were calculated using the Randles–Sevcik equation.

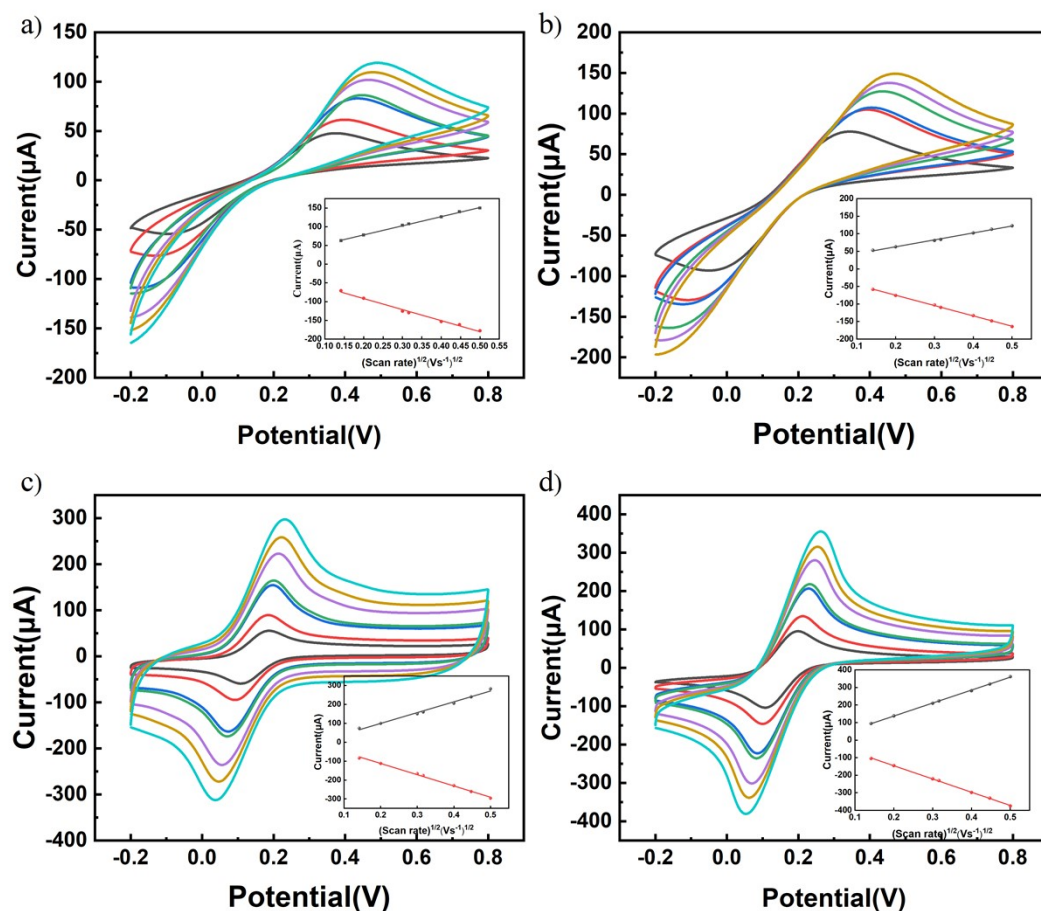

Fig. S5 Cyclic voltammograms of (a) SPE, (b)  $\text{Bi}_2\text{S}_3/\text{SPE}$ , (c)  $\text{rGO}/\text{MWCNT-COOH}/\text{SPE}$ , and (d)  $\text{Bi}_2\text{S}_3/\text{rGO}/\text{MWCNT-COOH}/\text{SPE}$  in 5.0 mM  $[\text{Fe}(\text{CN})_6]^{3-/4-}$  (0.1 M KCl) at varying scan rates. The inset shows the linear relationship between the peak current and the square root of the scan rate, indicating a diffusion-controlled process

## Supplementary Information (SI) for Analyst.

Based on the optimization of modifier loading volume (Fig. S6a), deposition potential (Fig. S6b), and deposition time (Fig. S6c), the optimal parameters of 4.0  $\mu\text{L}$ ,  $-0.1\text{ V}$ , and 300 s were selected for subsequent DPV electrochemical detection.

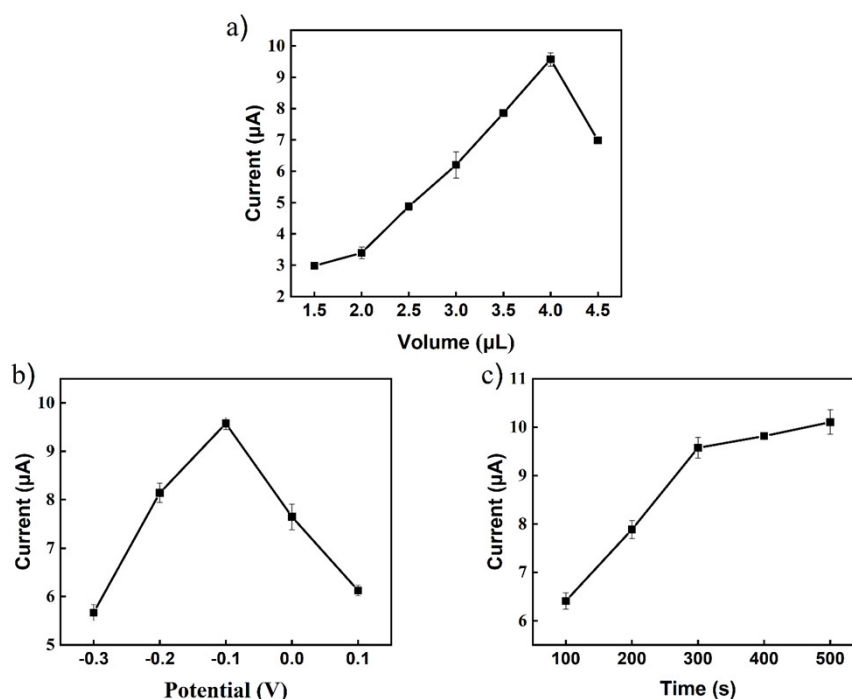

Fig. S6 Effects of (a) the loading volume of  $\text{Bi}_2\text{S}_3/\text{rGO}/\text{MWCNT-COOH}$ , (b) deposition potential, and (c) deposition time on the current response for capsaicin detection.

Table S1. Comparison of sample pretreatment duration and electrochemical detection performance for capsaicin sensors.

| Method                               | Sample Pre-treatment Time | Linear Range ( $\mu\text{M}$ )            | LOD                | Samples                                                                   | Reference |
|--------------------------------------|---------------------------|-------------------------------------------|--------------------|---------------------------------------------------------------------------|-----------|
| $\text{Fe}^{\text{III}}$ -HMOF-5/SPE | 140 min                   | 1–60 $\mu\text{M}$                        | 0.4 $\mu\text{M}$  | Fresh chili peppers                                                       | 1         |
| N-doped GrNPs/ePAD                   | 65°C, 20min               | 1–100 $\mu\text{M}$                       | 0.37 $\mu\text{M}$ | Dried chili samples                                                       | 2         |
| Ni-CNTs/S-rGO/GCE                    | 90 min                    | 0.01–100 $\mu\text{M}$                    | 1 nM               | Leisure duck neck, beef, chicken feet                                     | 3         |
| Stencil-printed graphene electrodes  | 60 min                    | 1–75 $\mu\text{M}$                        | 0.1 $\mu\text{M}$  | Homemade extract chili, red pepper sauce                                  | 4         |
| <b>This work</b>                     | <b>22 min</b>             | <b>0.05–2000 <math>\mu\text{M}</math></b> | <b>26 nM</b>       | <b>Dried/fresh chili peppers, chili sauce, chili oil, capsaicin cream</b> |           |

## Supplementary Information (SI) for Analyst.

As shown in Table S1, most reported electrochemical sensors for capsaicin suffer from long pretreatment times (up to 140 min) and limited sensitivity. In comparison, our method achieves a wide linear range (0.05–2000  $\mu\text{M}$ ), a low LOD (26 nM), and a rapid pretreatment process of just 22 min.

### Notes and references

1. X. Fang and R. S. Duan, *FRONTIERS IN CHEMISTRY*, 2022, **10**.
2. A. Soleh, K. Saisahas, K. Promsuwan, P. Thavarungkul, P. Kanatharana and W. Limbut, *ACS Applied Nano Materials*, 2020, **3**, 10094-10104.
3. X. Chen, T. Xie, Z. Wang and Q. Gu, *Food Chemistry*, 2024, **450**, 139257.
4. B. Ferreira, I. V. S. Arantes, J. L. M. Gongoni, L. A. Pradela-Filho and T. R. L. C. Paixão, *Microchemical Journal*, 2024, **207**, 112197.
